# Supplementary material for: RhB@MOF-5 Composite Film as a Fluorescence Sensor for Detection of Chilled Pork Freshness
Source: MDPI journal article supplement (doi:10.3390/bios12070544), 2022-07-20
Supplement: s1 [file s1]

**Table S1.** Eighteen channels in electronic nose

| Channel  | Sensitive substance                           |
|----------|-----------------------------------------------|
| LY2/LG   | Chlorine, fluorine, nitrogen oxides, sulfides |
| LY2/G    | Ammonia, amines, ketones, alcohols            |
| LY2/AA   | Ethanol, acetone, ammonia                     |
| LY2/GH   | Ammonia, amine compounds                      |
| LY2/gCTL | Hydrogen sulfide                              |
| LY2/gCT  | Propane, butane                               |
| T30/1    | Polar compounds, hydrogen chloride            |
| P10/1    | Ammonia, chlorine compounds, acids            |
| P10/2    | Methane, ethane                               |
| P40/1    | Fluorine, chlorine                            |
| T70/2    | Aromatic compounds                            |
| PA/2     | Ethanol, ammonia and amines                   |
| P30/1    | Flammable gas detection                       |
| P40/2    | Chloride                                      |
| P30/2    | Combustion gas detection                      |
| T40/2    | Chloride                                      |
| T40/1    | Fluoride                                      |
| TA/2     | General air pollution detection, alcohol      |
